# Supplementary material for: Sustained ERK Activation Underlies Reprogramming in Regeneration-Competent Salamander Cells and Distinguishes Them from Their Mammalian Counterparts
Source: PubMed Central journal article supplement — Stem Cell Reports. 2014 Jun 19;3(1):15–23. doi: 10.1016/j.stemcr.2014.05.009 (PMC4110794; doi:10.1016/j.stemcr.2014.05.009), 2014-06-19
Supplement: mmc2.pdf [file mmc2.pdf]

# Sustained ERK Activation Underlies Reprogramming in Regeneration-Competent Salamander Cells and Distinguishes Them from Their Mammalian Counterparts

Maximina H. Yun,<sup>1,\*</sup> Phillip B. Gates,<sup>1</sup> and Jeremy P. Brookes<sup>1</sup>

<sup>1</sup>Division of Biosciences, Institute of Structural and Molecular Biology, University College London, Gower Street, London WC1E 6BT, UK

\*Correspondence: [maximina.yun@ucl.ac.uk](mailto:maximina.yun@ucl.ac.uk)

<http://dx.doi.org/10.1016/j.stemcr.2014.05.009>

This is an open access article under the CC BY-NC-ND license (<http://creativecommons.org/licenses/by-nc-nd/3.0/>).

## SUMMARY

In regeneration-competent vertebrates, such as salamanders, regeneration depends on the ability of various differentiated adult cell types to undergo natural reprogramming. This ability is rarely observed in regeneration-incompetent species such as mammals, providing an explanation for their poor regenerative potential. To date, little is known about the molecular mechanisms mediating natural reprogramming during regeneration. Here, we have identified the extent of extracellular signal-regulated kinase (ERK) activation as a key component of such mechanisms. We show that sustained ERK activation following serum induction is required for re-entry into the cell cycle of postmitotic salamander muscle cells, partially by promoting the downregulation of p53 activity. Moreover, ERK activation induces epigenetic modifications and downregulation of muscle-specific genes such as Sox6. Remarkably, while long-term ERK activation is found in salamander myotubes, only transient activation is seen in their mammalian counterparts, suggesting that the extent of ERK activation could underlie differences in regenerative competence between species.

## INTRODUCTION

In most vertebrates, the process of myogenic differentiation entails the withdrawal of precursors from the cell cycle, followed by their fusion into myotubes. The multinucleate state is characterized by a permanent postmitotic arrest, which renders the myotubes unable to respond to proliferative cues (Pajalunga et al., 2008; Walsh and Perlman, 1997). In contrast, salamander myotubes remain responsive to such cues, being able to re-enter the cell cycle upon serum stimulation in culture (Tanaka et al., 1997) or after implantation within regenerating structures (Kumar et al., 2000).

In salamander (*Notophthalmus viridescens*) A1 myotubes (Ferretti and Brookes, 1988), serum stimulation induces a reprogramming process that includes partial dedifferentiation, as suggested by the downregulation of the myogenic gene *Myf5* (Imokawa et al., 2004), and re-entry into the cell cycle, which is also considered an aspect of dedifferentiation. The latter depends on the phosphorylation of Rb (Tanaka et al., 1997) and the downregulation of p53 activity (Yun et al., 2013). The serum component that triggers these responses is not a conventional growth factor but an as-yet-unidentified thrombin-activated serum component that acts as a mitogen for myotubes, but not for mononucleate precursors (Löf et al., 2007; Straube et al., 2004; Tanaka et al., 1999). Even though mammalian myotube nuclei cannot be reprogrammed upon exposure to this factor (Löf et al., 2007), they are able to re-enter the cell cycle after forming heterokaryons with salamander myotubes (Velloso et al., 2001). This suggests that even when

the initial response may be different, part of the pathway leading to serum-mediated reprogramming is conserved. Both the identity of the serum factor and the signaling pathways driving the reversal of the differentiated state in regeneration-competent salamander cells remain unknown, although extensive efforts to identify the serum factor are ongoing (Straube et al., 2004).

In proliferating cells, the extracellular signal-regulated kinase (ERK) family of mitogen-activated protein kinases (MAPKs) plays a critical role in driving cell-cycle progression in a variety of cell types (Albeck et al., 2013; Cook and McCormick, 1996; Murphy et al., 2002; Weber et al., 1997; Yamamoto et al., 2006). In fibroblasts, sustained ERK activation is required for successful S phase progression by promoting the downregulation of antiproliferative genes during G1 phase and controlling the state of Rb phosphorylation (Yamamoto et al., 2006). Hence, it is possible that ERK activation plays a role during the reprogramming of differentiated salamander cells. Herein, we have tested this hypothesis using the salamander A1 cell line as a model for serum-induced reprogramming.

## RESULTS AND DISCUSSION

### Sustained ERK Activation in Cell-Cycle Re-entry of Salamander Myotubes

Serum stimulation of A1 myotubes triggers an early activation of the ERK pathway, which is sustained for up to 48 hr post stimulation (Figures 1A and 1B). This is accompanied by a long-term increase in the protein levels of c-FOS

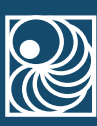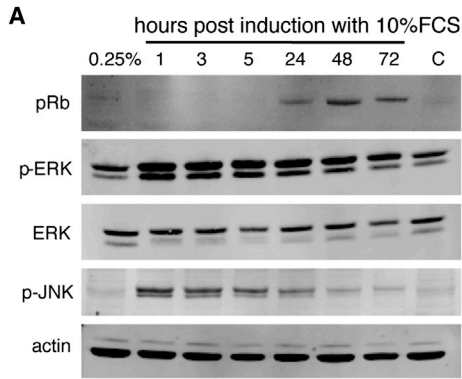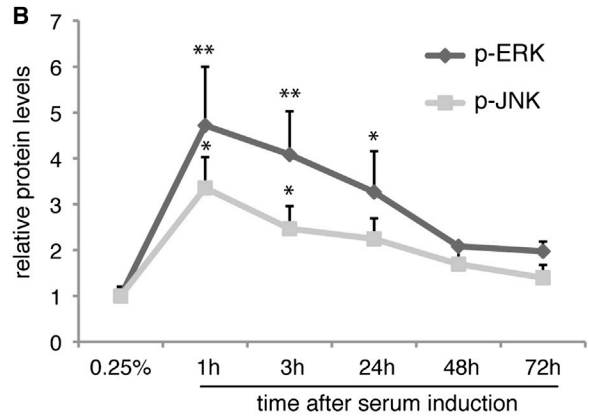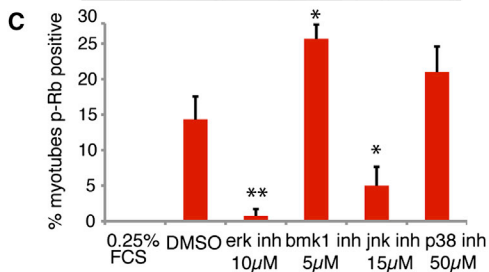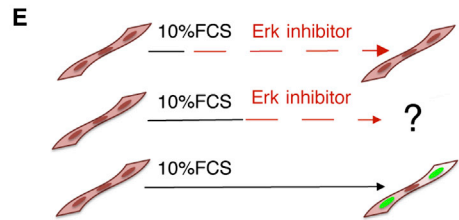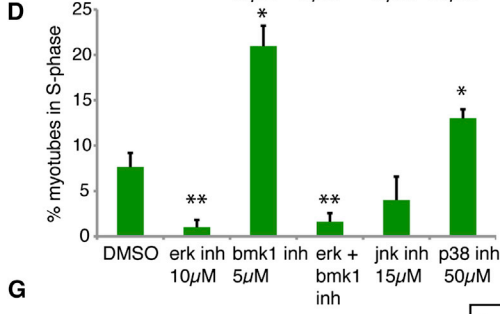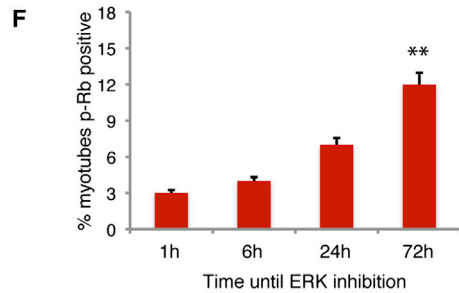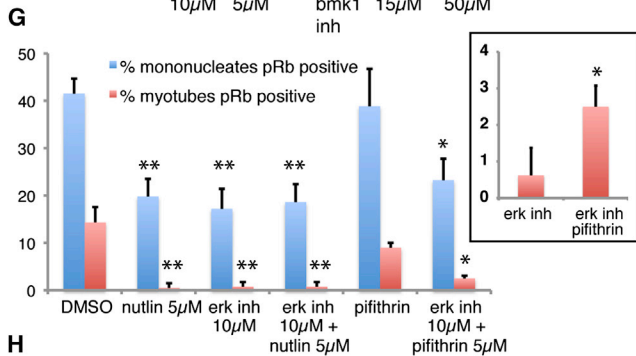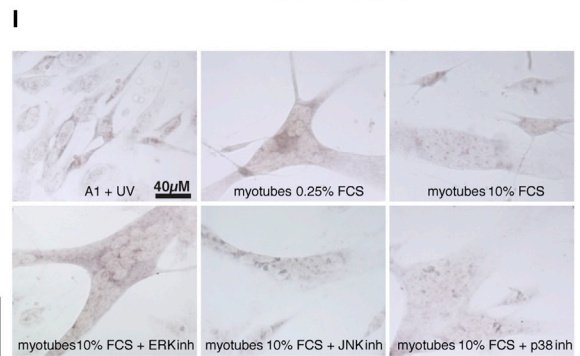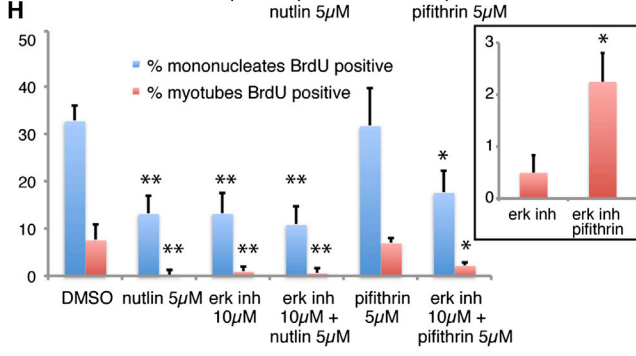

(legend on next page)

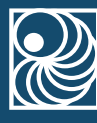

(Figure S1 available online), a sensor for ERK signal duration (Murphy et al., 2002). Other MAPK pathways are also activated, albeit to a lesser extent, including the stress-related MAPKs c-Jun N-terminal kinase (JNK) and p38 (Figures 1A, 1B, and S1). Therefore, we asked whether any of these pathways are required for myotube S phase re-entry following serum stimulation. The administration of specific inhibitors of ERK (U0126), JNK (SP600125), and p38 (506126) kinase activation (Figure S1), alongside serum stimulation, leads to differential disruption of both Rb phosphorylation (Figures 1C and S1) and S phase re-entry (Figures 1D and S1) depending on the targeted pathway. Inhibition of the JNK pathway leads to a 50% reduction in both myotube Rb phosphorylation and S phase re-entry, while disruption of the p38 MAPK not only does not impair these processes but also significantly enhances cell-cycle re-entry (Figure 1D). Remarkably, the inhibition of ERK signaling severely impairs both processes, suggesting that the activation of the ERK pathway is critical for the cell-cycle re-entry of salamander myotubes.

In a variety of mammalian contexts, it is the sustained activation of ERK signaling that promotes cell proliferation (Pagès et al., 1993; Weber et al., 1997; Yamamoto et al., 2006). To test whether sustained ERK activation mediates the cell-cycle aspects of salamander myotube reprogramming, we incubated A1 myotubes with serum and inhibited ERK signaling at different times post stimulation (Figure 1E). ERK inhibition, even at 24 hr post stimulation, has a negative effect on Rb phosphorylation (Figure 1F). This suggests that the sustained, but not transient, activation of the ERK pathway is necessary for cell-cycle re-entry of salamander myotubes.

Several isoforms of ERK MAPKs exist, with ERK1 and its close relative ERK2 mediating cell-cycle progression in a variety of cell types (Yang et al., 2013). The ERK inhibitor

used in this study inhibits the activation of ERK1/2 but can also have effects on ERK5/big MAPK 1 (BMK1) signaling (Kamakura et al., 1999). Hence, we used a specific BMK1 inhibitor to dissect which of the ERK MAPK pathways mediates the myotube response to serum. As seen in Figures 1C and 1D, the inhibition of BMK1 does not impair Rb phosphorylation or S phase re-entry but significantly enhances these processes. While the general ERK inhibitor decreases S phase re-entry in both myotubes and mononucleates, the BMK1 inhibitor has a negative effect on mononucleates but a positive one on myotubes (Figures 1 and S1). This suggests that activation of both ERK1/2 and ERK5 is required for the proliferation of mononucleates but only ERK1/2 activation is necessary for S phase re-entry in myotubes. The positive effect of BMK1 inhibition on myotube cell-cycle re-entry is likely due to its negative effect on mononucleate proliferation, as it is known that the percentage of myotubes in S phase is inversely proportional to the amount of mononucleates in their vicinity (Tanaka et al., 1997). Indeed, the inhibition of BMK1 combined with the addition of 30% confluent mononucleates abrogates the effect of ERK5 inhibition and impairs myotube S phase re-entry (Figure S1).

Sustained activation of ERK signaling has been shown to promote the downregulation of *Gadd45*, a classical p53 target (Yamamoto et al., 2006). Furthermore, we have recently shown that the downregulation of p53 activity is a critical step during A1 myotube cell-cycle re-entry (Yun et al., 2013). To test whether p53 downregulation is promoted by ERK signaling, we compared the effects on Rb phosphorylation and S phase re-entry caused by the stabilization of p53 using nutlin3a (Vassilev et al., 2004), the inhibition of ERK activation, or a combination of both. All three treatments affected both processes equally (Figures 1G and 1H) at the mononucleate or myotube level,

### Figure 1. Sustained ERK Activation Is Necessary for Cell-Cycle Re-entry of Differentiated, Regeneration-Competent Salamander Myotubes

(A) Western blot analysis of A1 myotube extracts pre (0.25% FCS) or post serum induction.

(B) Western blot quantification of phospho protein levels, relative to  $\beta$ -actin, showing the kinetics of ERK and JNK activation upon serum induction.

(C) Quantification of myotubes exhibiting phosphorylated Rb, following immunostaining 48 hr after serum induction, in the presence of the indicated compounds.

(D) Quantification of bromodeoxyuridine (BrdU)-positive myotubes, as measured by immunostaining at 72 hr post serum induction, following a BrdU pulse.

(E) Schematic representation of myotube treatments to test the effect of ERK inhibition in cell-cycle re-entry.

(F) ERK inhibition at different times after serum induction affects Rb phosphorylation in myotubes, as determined by immunostaining at 72 hr. \*\* refers to significant differences between 72 hr and 24 hr measurements.

(G–I) Serum-induced Rb phosphorylation (G) and myotube S phase re-entry (H) are impaired by p53 stabilization, ERK inhibition, or their combined treatment. Insets correspond to Rb phosphorylation (G) or cell-cycle re-entry (H) in myotubes exposed to the indicated treatments. (I) In situ hybridization against the p53 target gene *Gadd45*. ERK inhibition impairs the downregulation of *Gadd45* in A1 myotubes following serum induction.

Values represent the mean  $\pm$  SD (B) or mean  $\pm$  SEM (C–H) (\* $p$  < 0.05, \*\* $p$  < 0.01);  $n$  = 4 (B, F, and I) and  $n$  = 5 (C, D, G, and H), where  $n$  indicates the number of independent experiments. Scale bar in (I) represents 40  $\mu$ m.

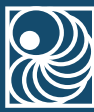

suggesting that the downregulation of p53 activity and the activation of ERK signaling form part of the same pathway. We additionally observed that while treatment of myotubes with the p53 inhibitor  $\alpha$ -pifithrin did not affect Rb phosphorylation or cell-cycle re-entry, the combined inhibition of ERK signaling and p53 had a negative effect on this processes. However, the joint inhibition of ERK and p53 significantly increased the percentage of myotubes positive for Rb phosphorylation and re-entering the cell cycle, when compared with the inhibition of ERK signaling on its own (Figures 1G and 1H). This suggests that ERK signaling is required for cell-cycle re-entry by, at least in part, promoting the downregulation of p53 activity. To test this further, we investigated the effect of inhibiting different MAPKs on the regulation of *Gadd45* gene expression by in situ hybridization. ERK inhibition abrogated the downregulation of *Gadd45* induced by serum stimulation (Figure 1I), suggesting that the activation of the ERK pathway promotes cell-cycle re-entry in salamander myotubes by downregulating p53 activity.

### ERK Activation Promotes Phenotypic Changes in Salamander Myotubes

A second aspect of the response to serum stimulation in salamander myotubes is the promotion of transcriptional changes that lead to partial dedifferentiation. As ERK activation is required at such an early stage of the response, it is plausible that it contributes to the promotion of dedifferentiation as well as cell-cycle progression. To address this possibility we cloned the new homolog of the muscle-specific gene *Sox6* (Hagiwara et al., 2007) (Figure S2) and examined its expression in purified myotube cultures. While serum stimulation leads to a 50% reduction of the relative levels of *Sox6* (Figure 2A), ERK inhibition abrogates this effect, suggesting that the downregulation of *Sox6* upon serum stimulation is dependent on ERK activation. This observation is consistent with a previous study suggesting that ERK activation drives the dedifferentiation of rodent Schwann cells (Harrisingh et al., 2004). While the expression of *Sox6* changed upon serum stimulation, we did not detect any changes in the protein levels of muscle-specific myosin heavy chain under similar conditions (Figure 2C). This is consistent with the notion that serum promotes a limited dedifferentiation process in regeneration-competent salamander myotubes.

Furthermore, we noticed that there are large-scale epigenetic changes in the A1 myotubes following serum stimulation. Immunostaining against the repressive histone mark dimethyl H3K9 (Jenuwein and Allis, 2001) revealed a decrease in signal intensity in myotubes upon serum stimulation, consistent with previous observations (Löf et al., 2007). Interestingly, this decrease is abrogated only by ERK, but not by JNK or BMK1 inhibition (Figure 2B).

Western blot analysis of purified myotube extracts indicates that there is a 50% decrease in dimethyl H3K9 upon serum stimulation but only a 20% decrease when ERK signaling is inhibited (Figure 2C). This is particularly interesting for two reasons. First, the demethylation of H3K9 at E2F-regulated promoters is required for the progression into S phase (Ogawa et al., 2002). Second, H3K9 demethylation is required for the expression of pluripotency-associated genes and the maintenance of embryonic stem cells (Loh et al., 2007).

In the light of these observations, it is possible that the changes in H3K9 demethylation, which we show to be dependent on ERK activation, generate a favorable environment for altering gene expression in the direction of partial dedifferentiation and cell-cycle progression in regeneration-competent cells.

### Lack of Sustained ERK Activation in Regeneration-Incompetent Mammalian Myotubes

While salamander myotubes are able to respond to serum stimulation by promoting a signaling cascade leading to partial dedifferentiation and cell-cycle re-entry, mammalian myotubes are unable to do so (Tanaka et al., 1997). Nevertheless, the latter appear to have retained some responsiveness, as serum stimulation (Tiainen et al., 1996) or incubation with partially purified serum factor preparations (Löf et al., 2007) leads to the upregulation of immediate-early proliferative response genes such as *c-fos*. However, the subsequent steps in the pathway leading to reprogramming do not take place. In the light of our observations, this suggests that altered or absent ERK activation could underlie the lack of responsiveness found in mammalian myotubes.

We explored this possibility using the murine myogenic cell line Pmi28 (Figure 3A), which can be induced to form myotubes that cannot dedifferentiate or re-enter the cell cycle upon serum stimulation (Duckmanton et al., 2005). Remarkably, we found that serum stimulation of Pmi28 myotubes leads to transient ERK1/2 activation, which peaks at 1 hr post induction and returns to baseline in approximately 3 hr (Figures 3B and 3C). In this system, the intensity of ERK activation is considerably lower than in the induced salamander myotubes (Figure 3C). Furthermore, unlike A1 myotubes, stimulated Pmi28 myotubes do not activate JNK and do not exhibit any changes in the total amounts of the repression marker dimethyl H3K9 (Figure 3D). However, serum stimulation promotes the upregulation of c-FOS and an increase in cyclin D1 and D3, which depend on the transient activation of ERK (Figures 3D and 3E). This suggests that the transient response to serum previously observed in mammalian myotubes is mediated by ERK signaling. Nonetheless, consistent with previous observations (Löf



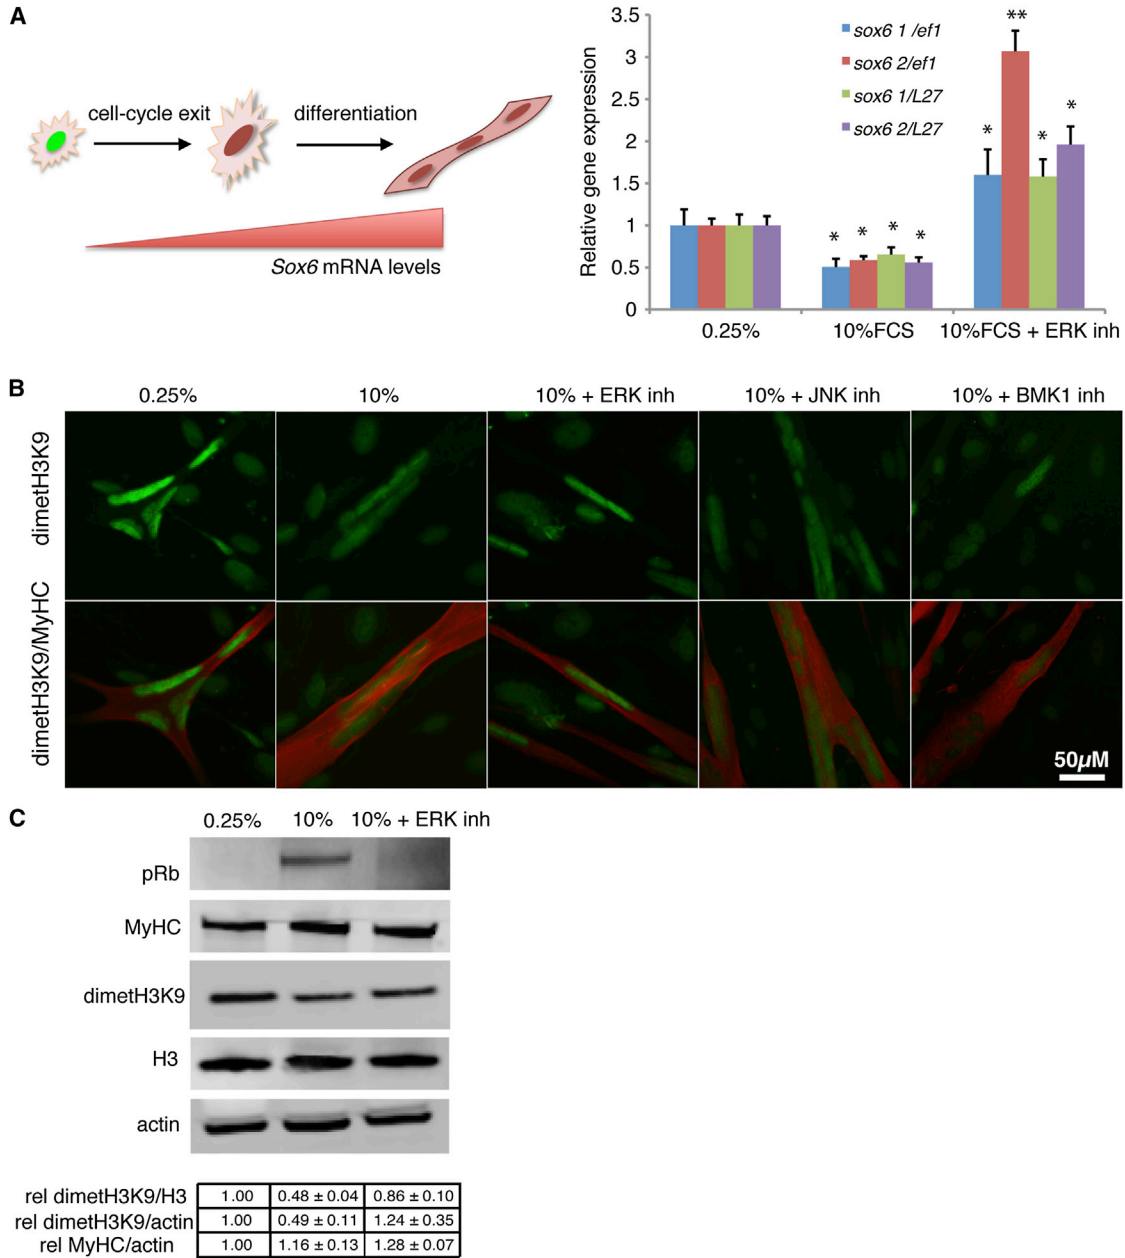

**Figure 2. ERK Activation Leads to Downregulation of Muscle-Specific Gene Expression and Promotes Epigenetic Changes during Reprogramming of Salamander Myotubes**

(A) Left: schematic representation of the variation in *Sox6* mRNA levels upon myogenic differentiation. Right: quantitative RT-PCR analysis of *Sox6* (with two different primers, *Sox6 1* and *Sox6 2*) in RNA extracts from purified A1 myotubes, normalized to *Ef1-α* or *L27*.

(B) Representative images of myotubes following immunostaining against dimethylated H3K9 and myosin heavy chain (MyHC) 1.5 days after the indicated treatments. Scale bar represents 50 μm.

(C) Western blot analysis of purified myotube extracts. Note the decrease in dimetH3K9 upon serum induction and its impairment when ERK signaling is inhibited. The relative amount of dimethylated H3K9 was quantified for the indicated treatments.

Values represent the mean ± SEM (\**p* < 0.05); *n* = 4 (A–C), where *n* indicates the number of independent experiments.

et al., 2007; Tiainen et al., 1996), we did not observe any changes in late proliferative genes such as Cyclin E2 and PCNA (Figure 3E). Together, these observations suggest

that the extent of ERK signaling could underlie differences in regenerative capabilities between salamander and mammalian cells.

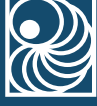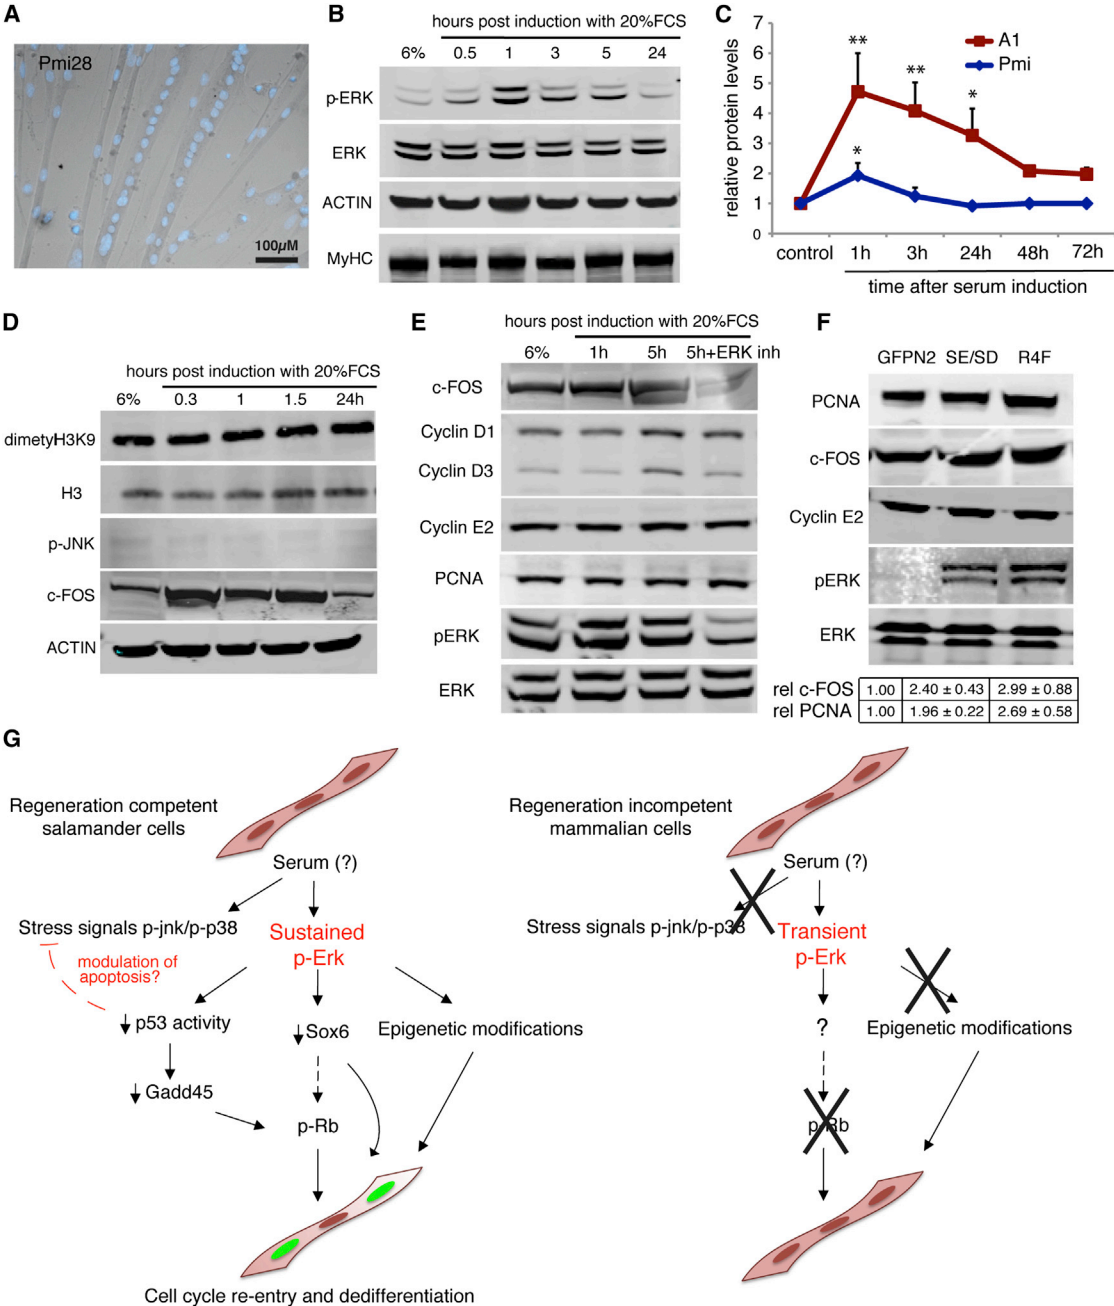

**Figure 3. Regeneration-Incompetent Mammalian Myotubes Do Not Trigger Sustained ERK Activation upon Serum Stimulation**  
 (A) Representative image of Pmi28 myotubes 3 days after myogenesis. Nuclei are stained with Hoechst 33258 (blue). Scale bar represents 100  $\mu$ m.  
 (B, C, and E) Western blot analysis of Pmi28 myotube extracts pre (6% HS) or at different times after induction with 20% FCS.  
 (D) Differential kinetics of ERK activation in mammalian versus salamander myotubes at different times after serum induction following western blot quantification of relative levels of phosphorylated ERK.  
 (F) Western blot analysis of whole-cell extracts from myotubes overexpressing pnGFPN2 (GFPN2), MEK1-R4F (R4F), and MEK1<sup>S218E/S222D</sup>(SE/SD). The relative amount of *c-fos* and PCNA was quantified for the indicated treatments.  
 (G) A model for the role of ERK1/2 activation during serum-induced reprogramming of regeneration-competent salamander myotubes compared to their mammalian counterparts.  
 Values represent the mean  $\pm$  SD (\* $p$  < 0.05, \*\* $p$  < 0.01);  $n$  = 4 (B–F), where  $n$  indicates the number of independent experiments.

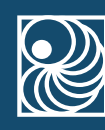

Finally, we tested whether the artificial promotion of ERK activation could promote cell-cycle re-entry in this system. Overexpression of two different constitutively active ERK activator kinase 1 (MEK1) mutants, MEK1-R4F and MEK1<sup>S218E/S222D</sup> (Mansour et al., 1994), does not lead to S phase re-entry in Pmi28 myotubes. Such failure in promoting cell-cycle progression could be attributed to the lack of coactivation of other MAPKs (e.g., JNK), the presence of epigenetic factors in mammalian myotubes that stabilize the differentiated state, or the intrinsic limitations of the overexpression system, which does not permit an exact mimicry of the required kinetics of ERK activation. However, constitutive ERK activation by overexpression of the MEK1 mutants does promote an increase in the protein levels of c-FOS and, importantly, the late proliferative gene PCNA (Figure 3F). These changes could result from either the sustained activation of ERK signaling or the transient elevation of phosphorylated ERK (pERK) levels upon constitutive expression of the mutants. The induction of untransfected Pmi myotubes with 20% serum leads to a pERK/ERK ratio of  $0.87 \pm 0.13$ . In contrast, the overexpression of MEK1-R4F and MEK1<sup>S218E/S222D</sup> leads to lower pERK/ERK ratios ( $0.34 \pm 0.05$  and  $0.53 \pm 0.07$ , respectively, corrected for total protein load); however, these are sustained over time. Hence, our results suggest that the promotion of sustained ERK activation can further the progression of the cell-cycle re-entry program in mammalian myotubes.

### A Model for the Role of ERK Signaling during the Reprogramming of Postmitotic Differentiated Cells

We propose that in regeneration competent salamander myotubes—and possibly other cell types—an as-yet-undefined thrombin-activated serum factor triggers sustained activation of ERK signaling (Figure 3G). Such activation leads to the downregulation of p53 activity, which facilitates cell-cycle re-entry via Rb phosphorylation, and promotes alterations in the gene expression landscape that could favor both partial dedifferentiation and cell-cycle re-entry. ERK activation could also crosstalk with the JNK and p38 stress-related signaling cascades, for example by modulating the apoptotic response mediated by these kinases. In contrast, regeneration-incompetent mammalian cells are incapable of inducing sustained ERK activation, most likely due to a lack of an upstream receptor or signaling component, and are therefore unable to undergo reprogramming.

In this study, we show that sustained ERK activation is required for the promotion of phenotypic changes suggestive of partial dedifferentiation and, critically, for cell-cycle re-entry in salamander myotubes. It remains an issue whether other muscle-specific genes are downregulated upon serum stimulation and whether this partial dediffer-

entiation is dependent on cell-cycle re-entry. In this regard, an earlier study showed that cellularization (Velloso et al., 2000), another index of dedifferentiation, proceeds in the absence of cell-cycle re-entry. Further studies should determine the connection between these processes.

It is particularly interesting that a similar mechanism to that used by proliferating cells following standard growth factor stimulation (sustained ERK signaling) is activated during salamander myotube reprogramming, as the serum factor responsible for triggering this process is not one of the conventional growth factors known to promote proliferation in undifferentiated cells (Straube et al., 2004; Tanaka et al., 1999). Indeed, the inhibition of fibroblast growth factor (FGF) and VEGF, growth factors that elicit sustained ERK1/2 signaling in a range of proliferating cell types, does not perturb either ERK1/2 or Rb phosphorylation in purified myotubes (Figure S3). Nevertheless, the use of a general receptor tyrosine kinase inhibitor abrogates ERK, JNK, and Rb phosphorylation following serum stimulation, suggesting that a receptor tyrosine kinase is required for the initiation of the reprogramming response. This unidentified RTK may be a target, direct or indirect, of the thrombin-activated serum factor. Further efforts should focus on defining the nature of both the serum factor as well as the RTK, so as to gain a better understanding of the mechanisms regulating the plasticity of the differentiated state in regeneration-competent cells and eventually apply this knowledge in a clinical setting.

## CONCLUSIONS

Together, our results suggest that the ability to trigger sustained ERK activation may underlie species-specific differences in the generation of cells of regenerative potential. Furthermore, they suggest that current approaches to induce regenerative potential in mammalian systems should consider the manipulation of MAPK signaling, with a focus on the promotion of ERK activation.

## EXPERIMENTAL PROCEDURES

### Cell Culture

A1 cells were previously derived from newt (*N. viridescens*) limb mesenchyme (Ferretti and Brockes, 1988). The cells were grown on 0.75% gelatine-coated plastic dishes in minimal essential medium (Gibco) supplemented with 10% heat-inactivated fetal calf serum (FCS; Gibco), 25% H<sub>2</sub>O, 2nM L-glutamine (Gibco), 10 µg/ml insulin (Sigma), and 100 U/ml penicillin/ streptomycin (Gibco) in a humidified atmosphere of 2.5% CO<sub>2</sub> at 25°C. Routine cell subculture was performed as previously described (Lo et al., 1993).

Pmi28 cells were a kind gift from A. Starzinski-Powitz (Goethe Universität, Germany). Mouse Pmi28 cells were grown on



BIOCOAT I T-75 flasks (Becton-Dickinson) in F-10 (HAM) media supplemented with 20% FCS (Gibco) and 100 U/ml penicillin/streptomycin (Gibco) in a humidified atmosphere of 6% CO<sub>2</sub> at 37°C. Cells were passaged at a 1:10 ratio every 3 days.

### Myotube Formation Assay

Myogenesis was induced in confluent A1 cells by lowering the fetal calf serum concentration from 10% to 0.25%. Cells were incubated in a humidified atmosphere of 2.5% CO<sub>2</sub> at 25°C. After 5 days, >90% of cells fused into multinucleate myotubes as previously described (Lo et al., 1993). Reprogramming was induced by incubating the myotubes in standard growth medium. All inhibitors used in the present manuscript are specified in Table S1.

In Pmi28 cell cultures, myogenesis was induced as previously described (Duckmanton et al., 2005). Cells were plated at high density onto collagen-coated plastic dishes and maintained for 3 days in differentiation media, consisting of Dulbecco's modified Eagle's medium (Gibco) supplemented with 6% horse serum (HS; Sigma) and 100 U/ml penicillin/streptomycin (Gibco).

### Myotube Purification

Myotubes were trypsinized for 1 min, neutralized with media, and sieved through a 100 μm mesh followed by a 35 μm mesh (Cell MicroSieve; BioDesign Inc. of New York). Myotubes were retained on the 35 μm mesh, washed with media to eliminate mononucleates, and collected from the sieve into dishes precoated with 0.75% gelatin.

Pmi28 myotubes were purified by addition of 50 μM Ara-C (Sigma), which specifically eliminates proliferating cells, to the differentiation media. The purity of the resulting cultures was assessed by fluorescence microscopy following incubation with Hoechst 33258 (2 μg/ml).

### Statistical Analysis

Statistical analyses were performed with Prism 4.0, and unpaired two-tailed t tests were applied unless otherwise stated. Paired two-tailed t tests were carried out to analyze RT-PCR experiments.

### ACCESSION NUMBERS

The GenBank accession number for the CDS of *Notophthalmus viridescens Sox6* reported in this paper is KJ801973.

### SUPPLEMENTAL INFORMATION

Supplemental Information includes Supplemental Experimental Procedures, three figures, and two tables and can be found with this article online at <http://dx.doi.org/10.1016/j.stemcr.2014.05.009>.

### ACKNOWLEDGMENTS

We are grateful to the members of the Brockes lab and Dr. Yutaka Matsubayashi for fruitful discussions and to Dr. Emmanuel Boucrot for providing reagents. This research was supported by an MRC Programme grant to J.P.B.

Received: November 25, 2013

Revised: May 12, 2014

Accepted: May 14, 2014

Published: June 19, 2014

### REFERENCES

- Albeck, J.G., Mills, G.B., and Brugge, J.S. (2013). Frequency-modulated pulses of ERK activity transmit quantitative proliferation signals. *Mol. Cell* **49**, 249–261.
- Cook, S.J., and McCormick, F. (1996). Kinetic and biochemical correlation between sustained p44ERK1 (44 kDa extracellular signal-regulated kinase 1) activation and lysophosphatidic acid-stimulated DNA synthesis in Rat-1 cells. *Biochem. J.* **320**, 237–245.
- Duckmanton, A., Kumar, A., Chang, Y.T., and Brockes, J.P. (2005). A single-cell analysis of myogenic dedifferentiation induced by small molecules. *Chem. Biol.* **12**, 1117–1126.
- Ferretti, P., and Brockes, J.P. (1988). Culture of newt cells from different tissues and their expression of a regeneration-associated antigen. *J. Exp. Zool.* **247**, 77–91.
- Hagiwara, N., Yeh, M., and Liu, A. (2007). Sox6 is required for normal fiber type differentiation of fetal skeletal muscle in mice. *Dev. Dyn.* **236**, 2062–2076.
- Harrisingh, M.C., Perez-Nadales, E., Parkinson, D.B., Malcolm, D.S., Mudge, A.W., and Lloyd, A.C. (2004). The Ras/Raf/ERK signaling pathway drives Schwann cell dedifferentiation. *EMBO J.* **23**, 3061–3071.
- Imokawa, Y., Gates, P.B., Chang, Y.T., Simon, H.G., and Brockes, J.P. (2004). Distinctive expression of Myf5 in relation to differentiation and plasticity of newt muscle cells. *Int. J. Dev. Biol.* **48**, 285–291.
- Jenuwein, T., and Allis, C.D. (2001). Translating the histone code. *Science* **293**, 1074–1080.
- Kamakura, S., Moriguchi, T., and Nishida, E. (1999). Activation of the protein kinase ERK5/BMK1 by receptor tyrosine kinases. Identification and characterization of a signaling pathway to the nucleus. *J. Biol. Chem.* **274**, 26563–26571.
- Kumar, A., Velloso, C.P., Imokawa, Y., and Brockes, J.P. (2000). Plasticity of retrovirus-labelled myotubes in the newt limb regeneration blastema. *Dev. Biol.* **218**, 125–136.
- Lo, D.C., Allen, F., and Brockes, J.P. (1993). Reversal of muscle differentiation during urodele limb regeneration. *Proc. Natl. Acad. Sci. USA* **90**, 7230–7234.
- Loh, Y.H., Zhang, W., Chen, X., George, J., and Ng, H.H. (2007). Jmjd1a and Jmjd2c histone H3 Lys 9 demethylases regulate self-renewal in embryonic stem cells. *Genes Dev.* **21**, 2545–2557.
- Löf, S., Straube, W.L., Drechsel, D., Tanaka, E.M., and Simon, A. (2007). Plasticity of mammalian myotubes upon stimulation with a thrombin-activated serum factor. *Cell Cycle* **6**, 1096–1101.
- Mansour, S.J., Matten, W.T., Hermann, A.S., Candia, J.M., Rong, S., Fukasawa, K., Vande Woude, G.F., and Ahn, N.G. (1994). Transformation of mammalian cells by constitutively active MAP kinase. *Science* **265**, 966–970.





- Murphy, L.O., Smith, S., Chen, R.H., Fingar, D.C., and Blenis, J. (2002). Molecular interpretation of ERK signal duration by immediate early gene products. *Nat. Cell Biol.* *4*, 556–564.
- Ogawa, H., Ishiguro, K., Gaubatz, S., Livingston, D.M., and Nakatani, Y. (2002). A complex with chromatin modifiers that occupies E2F- and Myc-responsive genes in G0 cells. *Science* *296*, 1132–1136.
- Pagès, G., Lenormand, P., L'Allemain, G., Chambard, J.C., Meloche, S., and Pouyssegur, J. (1993). Mitogen-activated protein kinases p42mapk and p44mapk are required for fibroblast proliferation. *Proc. Natl. Acad. Sci. USA* *90*, 8319–8323.
- Pajalunga, D., Mazzola, A., Franchitto, A., Puggioni, E., and Crescenzi, M. (2008). The logic and regulation of cell cycle exit and reentry. *Cell. Mol. Life Sci.* *65*, 8–15.
- Straube, W.L., Brockes, J.P., Drechsel, D.N., and Tanaka, E.M. (2004). Plasticity and reprogramming of differentiated cells in amphibian regeneration: partial purification of a serum factor that triggers cell cycle re-entry in differentiated muscle cells. *Cloning Stem Cells* *6*, 333–344.
- Tanaka, E.M., Gann, A.A., Gates, P.B., and Brockes, J.P. (1997). Newt myotubes reenter the cell cycle by phosphorylation of the retinoblastoma protein. *J. Cell Biol.* *136*, 155–165.
- Tanaka, E.M., Drechsel, D.N., and Brockes, J.P. (1999). Thrombin regulates S-phase re-entry by cultured newt myotubes. *Curr. Biol.* *9*, 792–799.
- Tiainen, M., Pajalunga, D., Ferrantelli, F., Soddu, S., Salvatori, G., Sacchi, A., and Crescenzi, M. (1996). Terminally differentiated skeletal myotubes are not confined to G0 but can enter G1 upon growth factor stimulation. *Cell Growth Differ.* *7*, 1039–1050.
- Vassilev, L.T., Vu, B.T., Graves, B., Carvajal, D., Podlaski, F., Filipovic, Z., Kong, N., Kammlott, U., Lukacs, C., Klein, C., et al. (2004). In vivo activation of the p53 pathway by small-molecule antagonists of MDM2. *Science* *303*, 844–848.
- Velloso, C.P., Kumar, A., Tanaka, E.M., and Brockes, J.P. (2000). Generation of mononucleate cells from post-mitotic myotubes proceeds in the absence of cell cycle progression. *Differentiation* *66*, 239–246.
- Velloso, C.P., Simon, A., and Brockes, J.P. (2001). Mammalian post-mitotic nuclei reenter the cell cycle after serum stimulation in newt/mouse hybrid myotubes. *Curr. Biol.* *11*, 855–858.
- Walsh, K., and Perlman, H. (1997). Cell cycle exit upon myogenic differentiation. *Curr. Opin. Genet. Dev.* *7*, 597–602.
- Weber, J.D., Cheng, J., Raben, D.M., Gardner, A., and Baldassare, J.J. (1997). Ablation of G1 overrides G1 restriction point control through Ras/ERK/cyclin D1-CDK activities. *J. Biol. Chem.* *272*, 17320–17326.
- Yamamoto, T., Ebisuya, M., Ashida, F., Okamoto, K., Yonehara, S., and Nishida, E. (2006). Continuous ERK activation downregulates antiproliferative genes throughout G1 phase to allow cell-cycle progression. *Curr. Biol.* *16*, 1171–1182.
- Yang, S.H., Sharrocks, A.D., and Whitmarsh, A.J. (2013). MAP kinase signalling cascades and transcriptional regulation. *Gene* *513*, 1–13.
- Yun, M.H., Gates, P.B., and Brockes, J.P. (2013). Regulation of p53 is critical for vertebrate limb regeneration. *Proc. Natl. Acad. Sci. USA* *110*, 17392–17397.

Stem Cell Reports, Volume 3

Supplemental Information

**Sustained ERK Activation Underlies Reprogramming in  
Regeneration-Competent Salamander Cells and  
Distinguishes Them from Their Mammalian Counterparts**

Maximina H. Yun, Phillip B. Gates, and Jeremy P. Brockes

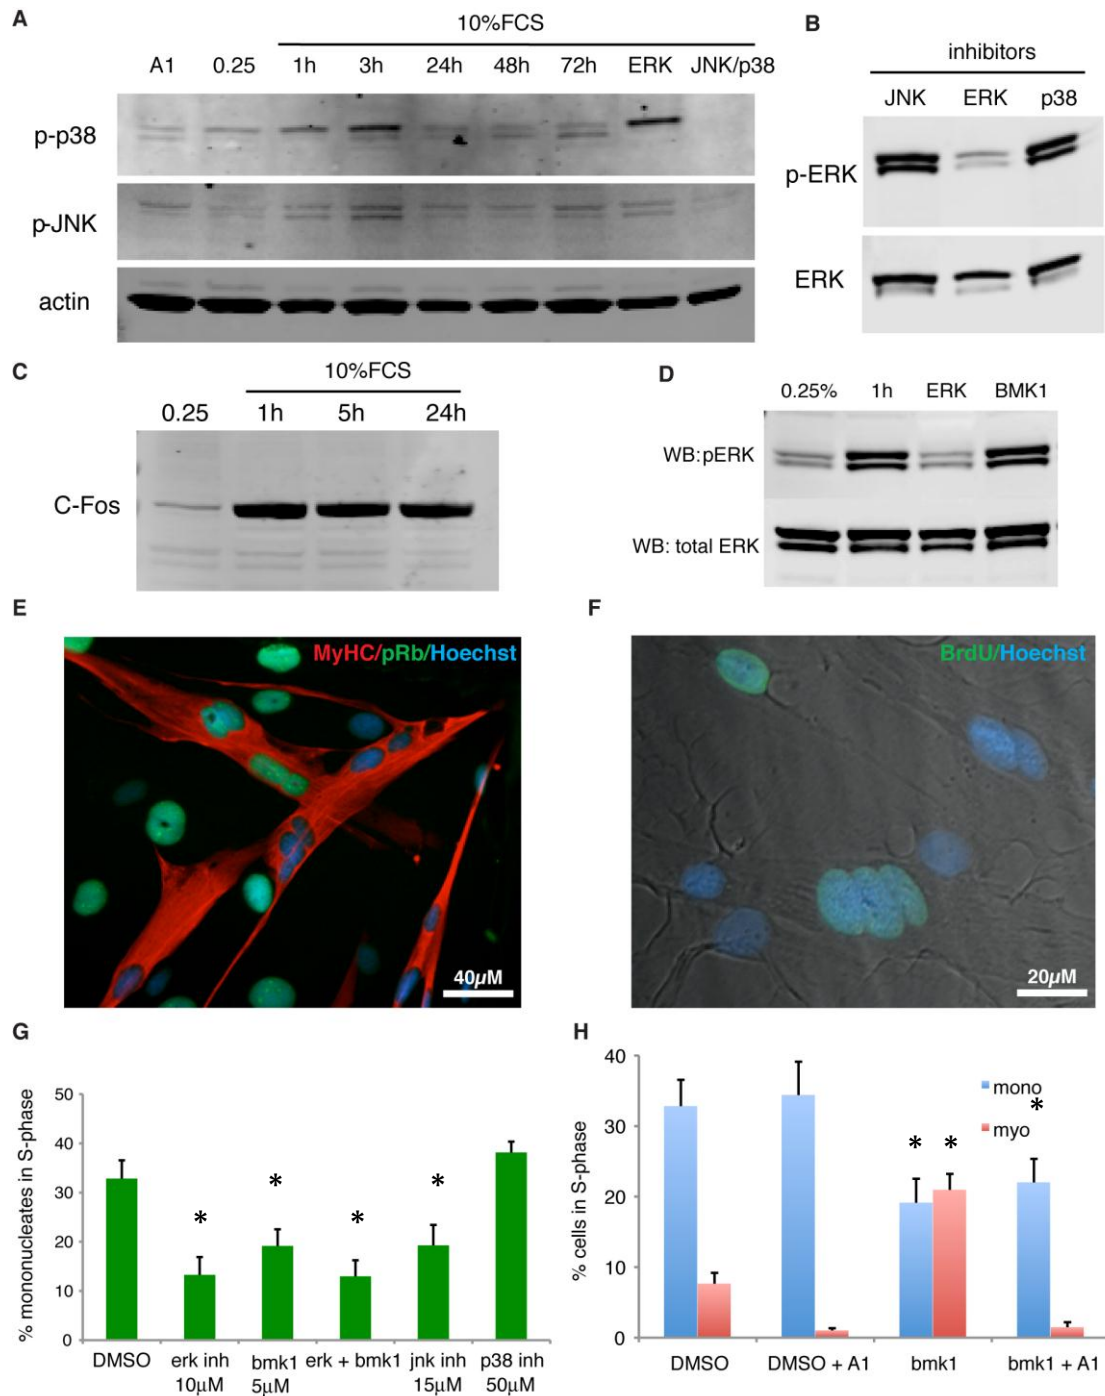

**Figure S1. Activation of JNK, p38 and c-Fos during myotube S-phase re-entry** (A, C) Western blot analysis of A1 myotube extracts pre (0.25%FCS) or at different times post induction with 10%FCS. ERK indicates treatment with an ERK inhibitor, JNK/p38 denote treatment with either a JNK or p38 inhibitor respectively. Treatments were initiated at 0h post induction. (B) Western blot analysis of A1 myotube extracts 1 hour post serum induction, treated with the indicated inhibitors. Note that the ERK inhibitor specifically abrogates ERK phosphorylation. **Inhibition of BMK1/ERK5 promotes S phase re-entry by decreasing A1 mononucleate proliferation** (D) Western blot analysis of A1 myotube extracts pre (0.25%FCS) or 1 hour post serum induction. (E)

Representative image of A1 myotubes after 2d in high serum stained with antibodies against p-RBS807/811, MyHC and Hoechst 33258. (F) Representative image of A1 myotubes at 3d post-induction in high serum following a BrdU pulse. Myotubes were stained with antibodies against BrdU and Hoechst 33258. (G,H) Quantification of BrdU positive mononucleate cells (G) or combined cultures (H), as measured by immunostaining at 72h post serum induction following a BrdU pulse. Cells were treated with the indicated compounds. In (H), myotubes were induced and 30% confluent A1 proliferating cells were added where indicated (A1). All values represent the mean  $\pm$  s.e.m (\* $p < 0.05$ ).  $n = 3$  (A-D),  $n = 4$  (G,H), where  $n$  indicates the number of independent experiments.



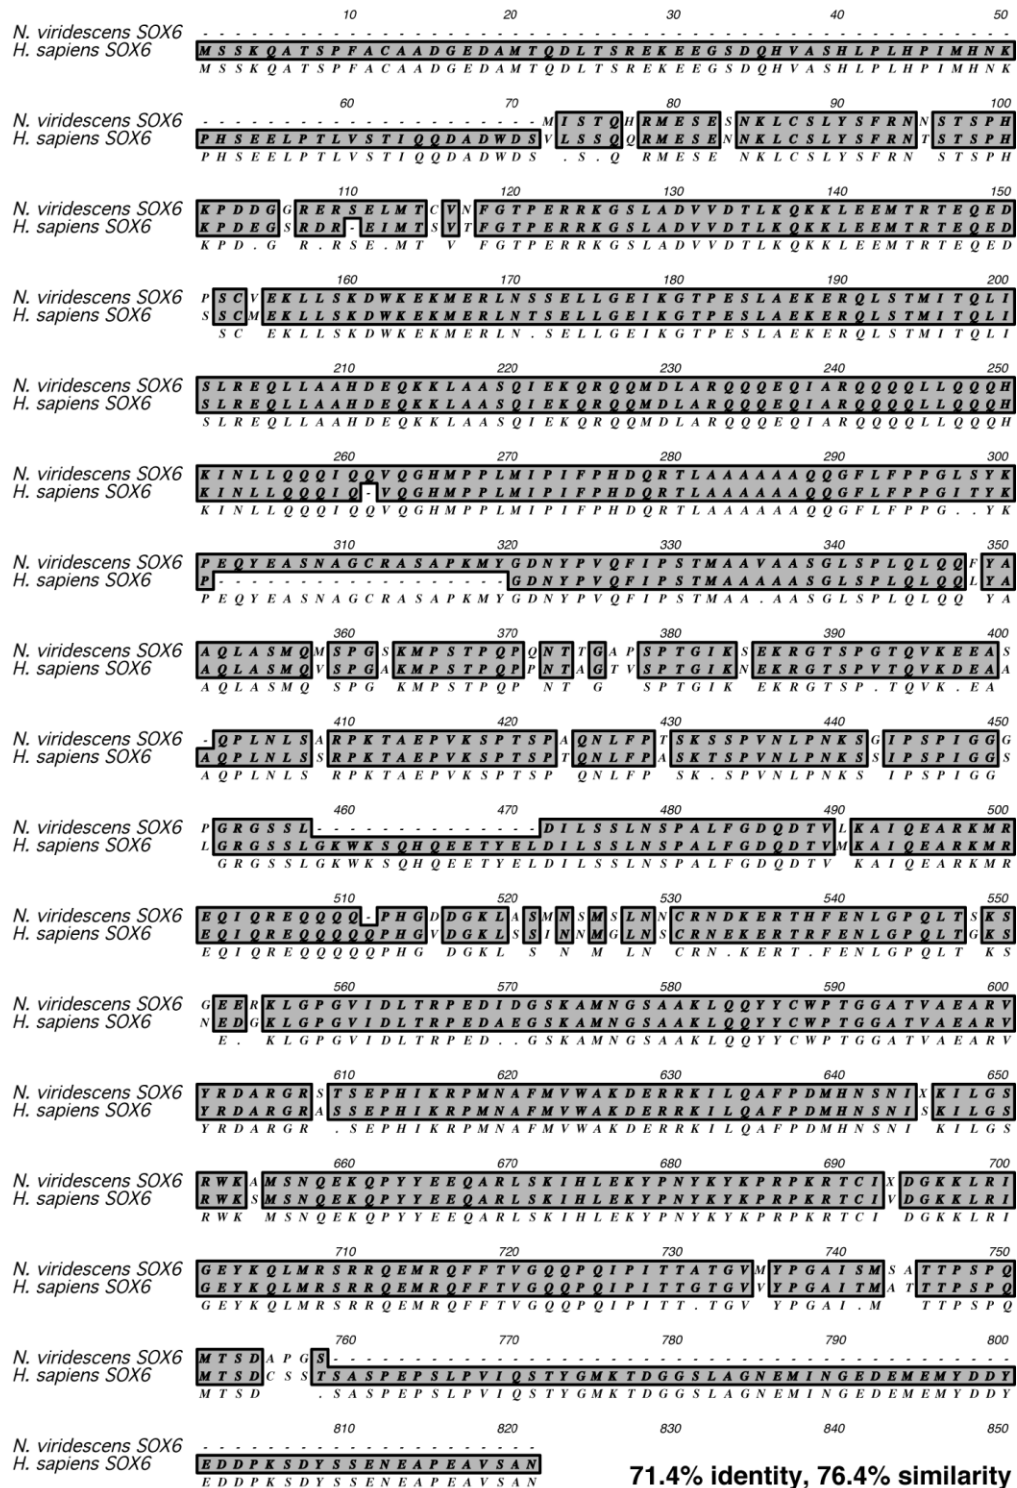

**Figure S2. Sequence alignment of human (*Homo sapiens*) and salamander (*Notophthalmus viridescens*) SOX6.** MacVector alignment of full-length protein sequences of the muscle-specific gene Sox6. The analysis reveals a high degree of evolutionary conservation.

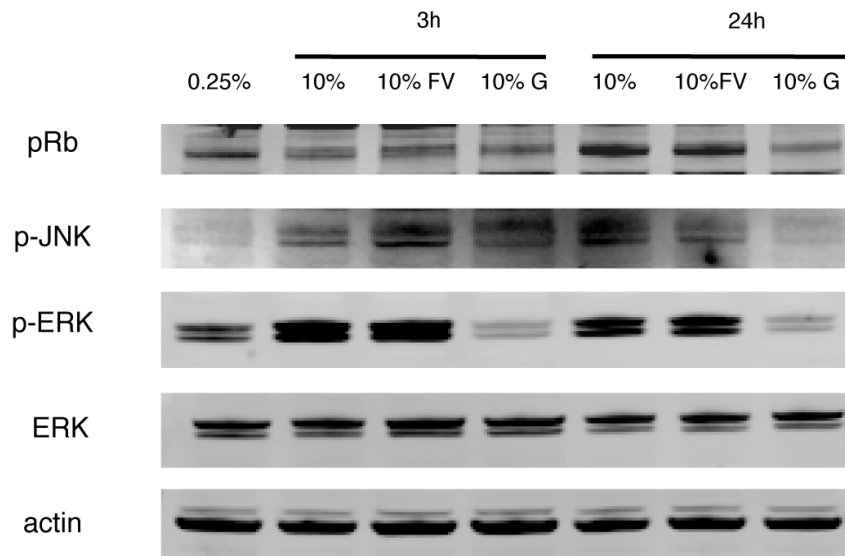

**Figure S3. A tyrosine kinase receptor, not responsive to FGF or VEGF, is required for serum-induced sustained ERK activation.** (A) Western blot analysis of A1 myotube extracts pre (0.25%FCS), and at 3h and 24h post induction with 10%FCS. Myotubes were treated as indicated. FV indicates treatment with an FGF/VEGF inhibitor, whereas G denotes treatment with a general Receptor Tyrosine Kinase inhibitor. Treatments were initiated at 0h post induction. n=3, where n indicates the number of independent experiments

## Supplementary Experimental Procedures

### Lipofection

The vector pnGFP-N2 was modified from pEGFP-N2 (Clontech) by addition of a nuclear localization signal to the original EGFP sequence. The MEK1-R4F (plasmid 40810) and MEK1<sup>S218E/S222D</sup> (plasmid 40809) vectors were obtained from Addgene. These constructs were delivered to Pmi28 cells by lipofection using Lipofectamine 2000 (Invitrogen) as per manufacturer's instructions. Briefly, cells were transfected with 1.5µg of pnGFP-N2, 1.5µg of the indicated vector, and 8µl Lipofectamine 2000 per 3.5cm dish for 4 hours. Cells were then incubated in myotube differentiation media for 3 days in the presence of Ara-C. This method gave a transfection efficiency of 50%, as assessed by immunofluorescence of nuclear GFP. Whole cell extracts were collected at 4 days post lipofection and analysed as described.

### **Western blot Analysis**

Protein extracts were prepared by resuspending cells in 0.02M Hepes (pH 7.9), 0.2mM EDTA, 1.5mM MgCl<sub>2</sub>, 0.42M NaCl, 25% glycerol, incubating for 30 minutes at 4°C and clearing the debris by centrifugation. The resulting extracts were analysed by SDS polyacrylamide gel electrophoresis and transferred to a nitrocellulose membrane (Whatman), which was incubated in Odyssey blocking buffer (Licor) and incubated with the indicated antibodies overnight (Supplementary Table 3). The membrane was then washed twice in TBS, incubated with IR labelled secondary antibodies, AlexaFluor680 and AlexaFluor800, against the corresponding species (Licor) and analysed with an Odyssey scanner (Licor).

### **Quantitative RT-PCR**

RNA was isolated from purified myotube cell cultures using Tri Reagent (Sigma) and random primed cDNA synthesised using Superscript II (Invitrogen). *Notophthalmus viridescens Sox6* (**GenBank KJ801973**) gene expression was determined by quantitative real time PCR with two sets of primers (*Sox6* 1 fwd: GGCAGTACAGAAACCTGT; *Sox6* 1 rev: CCCCTATTGTAGCATATCTGGC; *Sox6* 2 fwd: GTGCAGTATTGACGTGAGG; *Sox6* 2 rev: GGTTGAAAGGACAGTCTTGAGG ; *Ef1 $\alpha$*  fwd: AACATCGTGGTCATCGGCCAT; *Ef1 $\alpha$*  rev: GGAGGTGCCAGTGATCATGTT) and iQ SYBR Green supermix (Bio-rad), on a Chromo 4 instrument running Opticon 3 software (Bio-rad). All reactions were run in triplicate and at least 3 independent RNA preparations were analysed for each sample.

### **In situ hybridization**

A 688 kb fragment of axolotl *Gadd45 $\beta$*  (tctcgagGCAAGGATTGGCATATCAC, tctagaGAGACCGAAGGCACCCACGTG) was cloned into pciNEO vector (Promega) and the resulting construct was linearised with either XbaI or XhoI. The respective linearised templates were transcribed with T3 or T7 RNA polymerases to generate digoxigenin-UTP labelled antisense or sense riboprobes following the manufacturer's protocol (Roche). In situ hybridization of cultured

newt A1 cells with the digoxigenin-UTP labelled riboprobes was performed as previously described (Imokawa et al., 2004).

### **Immunofluorescence staining**

Cells were fixed in 2% PFA for 1 minute, followed by a 5-minute incubation in cold 100% methanol and processed as described elsewhere (Duckmanton et al., 2005). Cells were incubated with primary antibodies overnight. In all cases, anti-mouse or anti-rabbit AlexaFluor488 and AlexFluor594 antibodies (Invitrogen) were used for secondary staining. Hoechst 33258 (2µg/ml) was used for nuclei counterstaining. Samples were observed under a Zeiss Axioskop2 microscope and images were acquired with a Hamamatsu Orca camera using Openlab (Improvision) software. Whenever comparative analyses between different cell treatments were performed, all images were acquired with identical camera settings and illumination control. Image processing (contrast enhancement) was equally applied to all matched experimental and control samples using Openlab software.

### **BrdU Analysis**

Cells and myotubes were labeled for 2h and 24h respectively by adding 1 µl/ml 5-bromo-2 deoxyuridine/5-fluoro-2-deoxyuridine (BrdU) to the growth media. Following the corresponding incubation period, cells were fixed in 4% paraformaldehyde for 1 minute followed by 100% methanol for 5 minutes, and stained for bromodeoxyuridine as previously described (Barres et al., 1994; Tanaka et al., 1997).

### **Supplementary Table 1 - Inhibitors**

| <b>Inhibitor</b>          | <b>Inhibits</b> | <b>Company</b>     | <b>Final concentration</b> |
|---------------------------|-----------------|--------------------|----------------------------|
| <b>U0126</b>              | MEK1            | Calbiochem         | 10µM                       |
| <b>SP600125</b>           | JNK             | Calbiochem         | 15µM                       |
| <b>p38 MAP kinase inh</b> | p38             | MERK               | 50µM                       |
| <b>BMK1 (XDM8)</b>        | ERK5/BMK1       | Santa Cruz biotech | 5µM                        |
| <b>(-)Nutlin3a</b>        | MDM2-p53        | Cayman             | 1µM                        |



|                            |                           |                 |      |
|----------------------------|---------------------------|-----------------|------|
| interaction                |                           |                 |      |
| <b>FGF/VEGF (PD173074)</b> | FGF/VEGF                  | Insight biotech | 5µM  |
| <b>RTK</b>                 | Receptor tyrosine kinases | MERK            | 10µM |

## Supplementary Table 2 – Antibodies

| Antibody             | Origin          | Clonality  | Species | Dilution | dilution |
|----------------------|-----------------|------------|---------|----------|----------|
|                      |                 |            |         | WB       | IHC      |
| <b>p-ERK1/2</b>      | Sigma           | monoclonal | rabbit  | 1:1000   | 1:500    |
| <b>Total ERK1/2</b>  | Cell signalling | polyclonal | rabbit  | 1:200    | 1:100    |
| <b>βactin</b>        | Sigma           | monoclonal | mouse   | 1:2000   | 1:1000   |
| <b>p-JNK</b>         | NEB             | monoclonal | mouse   | 1:5000   | 1:1000   |
| <b>p-p38</b>         | ABD Serotec     | polyclonal | rabbit  | 1:500    | N/A      |
| <b>Dimethyl H3K9</b> | Millipore       | polyclonal | rabbit  | 1:500    | 1:300    |
| <b>MyHC</b>          | custom made     | monoclonal | mouse   | 1:2000   | 1:1000   |
| <b>BrdU</b>          | Sigma           | monoclonal | mouse   | N/A      | 1:3000   |
| <b>pRB S807/811</b>  | Cell signalling | polyclonal | rabbit  | 1:1000   | 1:500    |
| <b>H3 (D1H2)</b>     | Cell signalling | monoclonal | rabbit  | 1:500    | N/A      |
| <b>c-FOS (Ab-1)</b>  | Millipore       | monoclonal | mouse   | 1:500    | N/A      |
| <b>CCND1-D3</b>      | from E. Boucrot | monoclonal | mouse   | 1:500    | N/A      |
| <b>Cyclin E2</b>     | Cell signalling | monoclonal | rabbit  | 1:500    | N/A      |
| <b>PCNA (PC10)</b>   | Cell signalling | monoclonal | mouse   | 1:500    | N/A      |

## Supplementary References

Barres, B.A., Lazar, M.A., and Raff, M.C. (1994). A novel role for thyroid hormone, glucocorticoids and retinoic acid in timing oligodendrocyte development. *Development* 120, 1097-1108.

Duckmanton, A., Kumar, A., Chang, Y.T., and Brockes, J.P. (2005). A single-cell analysis of myogenic dedifferentiation induced by small molecules. *Chem Biol* 12, 1117-1126.

Imokawa, Y., Gates, P.B., Chang, Y.T., Simon, H.G., and Brockes, J.P. (2004). Distinctive expression of Myf5 in relation to differentiation and plasticity of newt muscle cells. *Int J Dev Biol* 48, 285-291.

Tanaka, E.M., Gann, A.A., Gates, P.B., and Brockes, J.P. (1997). Newt myotubes reenter the cell cycle by phosphorylation of the retinoblastoma protein. *J Cell Biol* 136, 155-165.
